# Supplementary material for: Personalized Bioconversion of Panax Notoginseng Saponins Mediated by Gut Microbiota Between Chinese-diet and Western-diet Healthy Subjects
Source: Research Square preprint supplement (doi:10.21203/rs.3.rs-500625/v1), 2021-05-11
Supplement: Supplementary file 1 [file 4b34ad523b0177d498990bcb.docx]

**Supplementary Table**

**Personalized bioconversion of *Panax notoginseng* saponins mediated by gut microbiota between Chinese-diet and Western-diet healthy subjects**

Supplementary table 1 MRM parameters of detected compounds

| Compounds | Q1/Q3(Da) | Dwell Time(ms) | CE(V) | DP(V) | EP(V) | CXP(V) |
| --- | --- | --- | --- | --- | --- | --- |
| GCK | 425.4/407.5 | 100 | 21 | 92 | 9 | 8 |
| GRh2 | 605.3/198.1 | 100 | 42 | 88 | 10 | 10 |
| GF1 | 661.2/203.0 | 100 | 45 | 147 | 6 | 11 |
| PPD | 425.6/407.4 | 100 | 22 | 72 | 7 | 13 |
| PPT | 459.3/221.4 | 100 | 36 | 124 | 7 | 20 |
| Digoxin | 781.4/97.0 | 100 | 50 | 90 | 8 | 9 |

Supplementary table 2 Precision of five main metabolites(mean, RSD＜15%)

| **Compounds** | **Conc. added (ng/mL)** | | **Intra-day (n = 6)** | **Inter-day (n=18)** |
| --- | --- | --- | --- | --- |
| **Precision (%)** | **Precision (%)** |
| **GCK** | 14.8 | 6.42 | | 12.1 |
| **RH2** | 11.9 | 6.67 | | 13.3 |
| **GF1** | 13.1 | 8.77 | | 13.4 |
| **PPD** | 14.9 | 8.37 | | 13.3 |
| **PPT** | 96.7 | 8.63 | | 12.9 |
